# Supplementary material for: Boosted charge separation in direct Z-scheme heterojunctions of CsPbBr3/Ultrathin carbon nitride for improved photocatalytic CO2reduction
Source: Royal Society of Chemistry journal article supplement (doi:10.1039/d2ta07965h), 2022-11-21
Supplement: d2ta07965h1.pdf [file d2ta07965h1.pdf]

## Electronic Supplementary Information

### **Boosted charge separation in direct z-scheme heterojunction of CsPbBr<sub>3</sub>/ultrathin carbon nitride for improved photocatalytic CO<sub>2</sub> reduction**

Fanqi Luo<sup>a</sup>, Mingyang Liu<sup>b</sup>, Mang Zheng<sup>b</sup>, Qi Li<sup>\*b</sup>, Hong Wang<sup>\*a</sup>, Jing Zhou<sup>c</sup>, Yong Jiang<sup>d</sup>, Yaoguang Yu<sup>e</sup>, Baojinag Jiang<sup>\*a</sup>

<sup>a</sup> F.Q. Luo, Prof. H. Wang, Prof. B. J. Jiang

Key Laboratory of Functional Inorganic Material Chemistry, Ministry of Education of the People's Republic of China, School of Chemistry and Materials Science, Heilongjiang University, Harbin 150080, China.

<sup>b</sup> M. Y. Liu, M. Zheng, Q. Li

College of Material Science and Chemical Engineering, Harbin Engineering University, Harbin 150001, China.

<sup>c</sup> Prof. J. Zhou

Shanghai Institute of Applied Physics, Chinese Academy of Sciences, Shanghai 201800, China

<sup>d</sup> Prof. Y. Jiang

College of Biological and Chemical Engineering, Guangxi University of Science and Technology, Liuzhou 545006, China

<sup>e</sup> Prof. Y. Y. Yu

School of Materials, Sun Yat-sen University, Shenzhen 518107, P. R. China.

E-mail: liqchem@sina.com; wanghong1@hlju.edu.cn; jbj@hlju.edu.cn

## **Table of Content**

|                                                                                                                                                                                                                           |    |
|---------------------------------------------------------------------------------------------------------------------------------------------------------------------------------------------------------------------------|----|
| <b>Fig. S1</b> Typical TEM, AFM images and height cutaway view of (a-c) CNN and (d-f) CPBN.....                                                                                                                           | 3  |
| <b>Fig. S2</b> XRD patterns of CPBN, CNN, CPBN/CNN-2, CPBN/CNN-3 and CPBN/CNN-4, respectively.....                                                                                                                        | 4  |
| <b>Fig. S3</b> Raman spectra of CNN and CPBN/CNN-3.....                                                                                                                                                                   | 5  |
| <b>Fig. S4</b> EDX spectrum of CPBN/CNN-3. ....                                                                                                                                                                           | 6  |
| <b>Fig. S5</b> The XPS spectra of samples: (a) survey, (b) Br 3d. ....                                                                                                                                                    | 7  |
| <b>Fig. S6</b> Relative WF maps of CNN, CPBN and CPBN/CNN-3. ....                                                                                                                                                         | 8  |
| <b>Fig. S7</b> Steady-state PL spectra of CNN, CPBN and CPBN/CNN-3. ....                                                                                                                                                  | 9  |
| <b>Fig. S8</b> Photoelectrochemical amperometric I-t plots of CNN, CPBN and CPBN/CNN-3. ....                                                                                                                              | 10 |
| <b>Fig. S9</b> EIS Nyquist plots of CNN, CPBN and CPBN/CNN-3. ....                                                                                                                                                        | 11 |
| <b>Fig. S10</b> (a) CH <sub>4</sub> , (b) CO and (c) O <sub>2</sub> yield of CNN, CPBN and CPBN/CNN-X by recording every 1h upon illumination for 4 h. ....                                                               | 12 |
| <b>Fig. S11</b> (a) Photocatalytic time courses of, CO and CH <sub>4</sub> evolution of CNN, CPBN/CNN-X, CPBN, (b) CH <sub>4</sub> and CO yield of as-synthesized photocatalysts, along with different amount water. .... | 13 |
| <b>Fig. S12</b> (a) TEM and (b) XRD patterns of CPBN/CNN-3 after photocatalytic reaction. ....                                                                                                                            | 14 |
| <b>Fig. S13</b> The AQE of CPBN/CNN-3. ....                                                                                                                                                                               | 15 |
| <b>Fig. S14</b> (a) GC-MS spectrum of the gas-phase products driven for CPBN/CNN-3 in the photocatalytic reduction of H <sub>2</sub> <sup>18</sup> O. ....                                                                | 16 |
| <b>Fig. S15</b> GC-MS spectrum of the gas-phase products driven for CPBN/CNN-3 in the photocatalytic reduction of D <sub>2</sub> O. ....                                                                                  | 17 |
| <b>Table S1.</b> Fitted PL decay parameters of CPBN, CNN and CPBN/CNN-3.....                                                                                                                                              | 18 |
| <b>Table S2.</b> Summary of photocatalytic CO <sub>2</sub> reduction performances of different catalysts after irradiation for 4 h.....                                                                                   | 19 |
| <b>Table S3.</b> Comparison of the measured evolution rates of O <sub>2</sub> with its theoretical ones in terms of the amount of photoreduction products. ....                                                           | 20 |
| <b>Table S4.</b> Evolution of CO and CH <sub>4</sub> under different reaction conditions; .....                                                                                                                           | 21 |
| <b>Table S5.</b> Summary of the photocatalytic CO <sub>2</sub> reduction performance of perovskite-based catalysts. ....                                                                                                  | 22 |
| <b>References:</b> .....                                                                                                                                                                                                  | 24 |

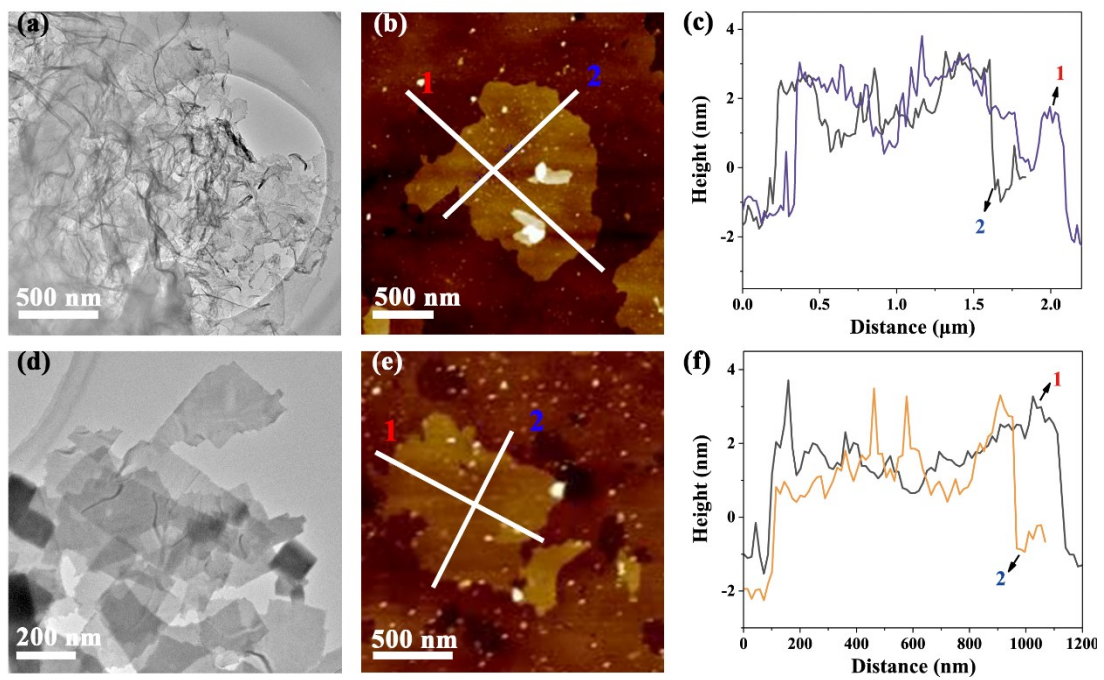

**Fig. S1** Typical TEM, AFM images and height cutaway view of (a-c) CNN and (d-f) CPBN.

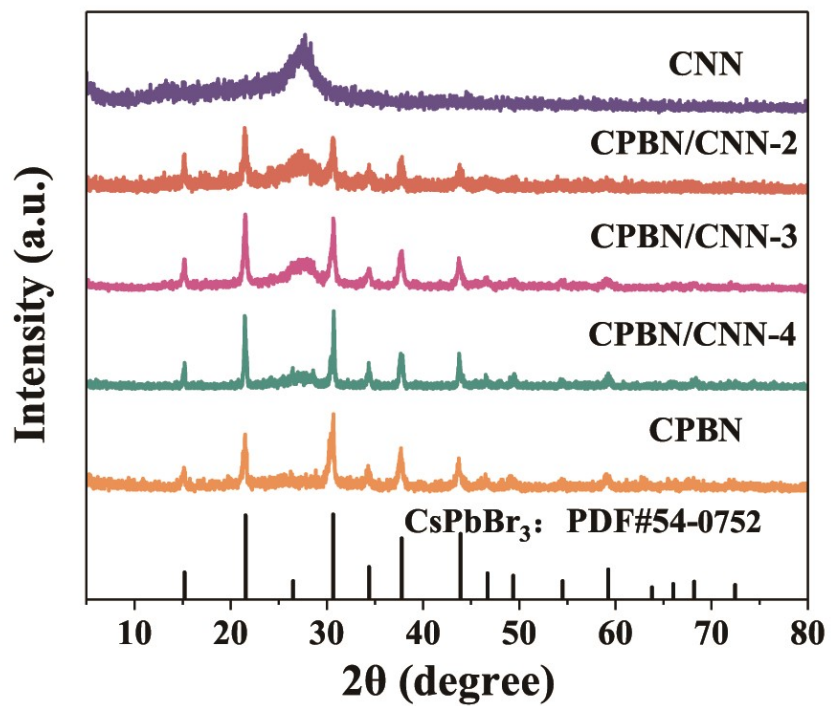

**Fig. S2** XRD patterns of CPBN, CNN, CPBN/CNN-2, CPBN/CNN-3 and CPBN/CNN-4, respectively.

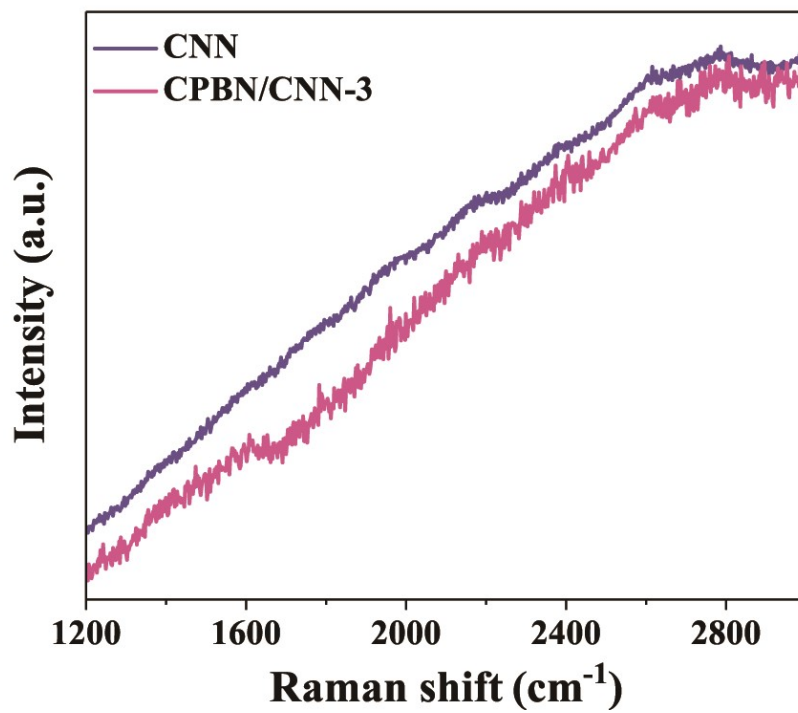

**Fig. S3** Raman spectra of CNN and CPBN/CNN-3.

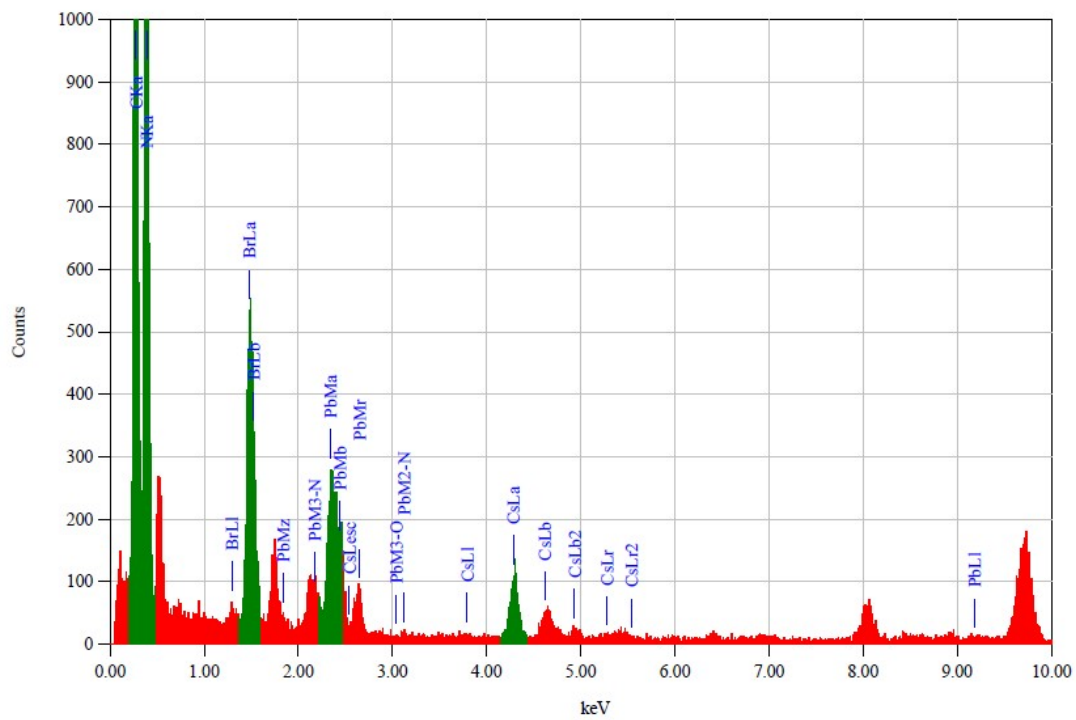

Fig. S4 EDX spectrum of CPBN/CNN-3.

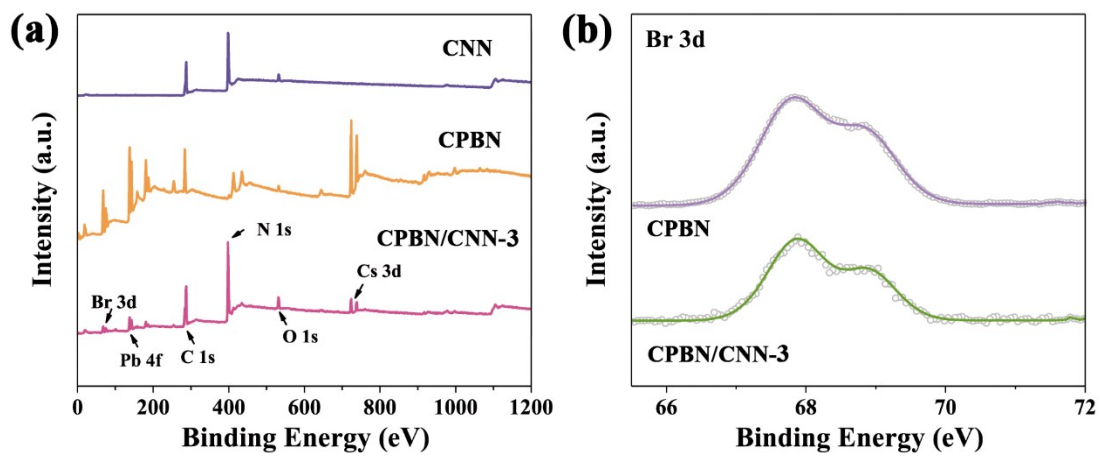

Fig. S5 The XPS spectra of samples: (a) survey, (b) Br 3d.

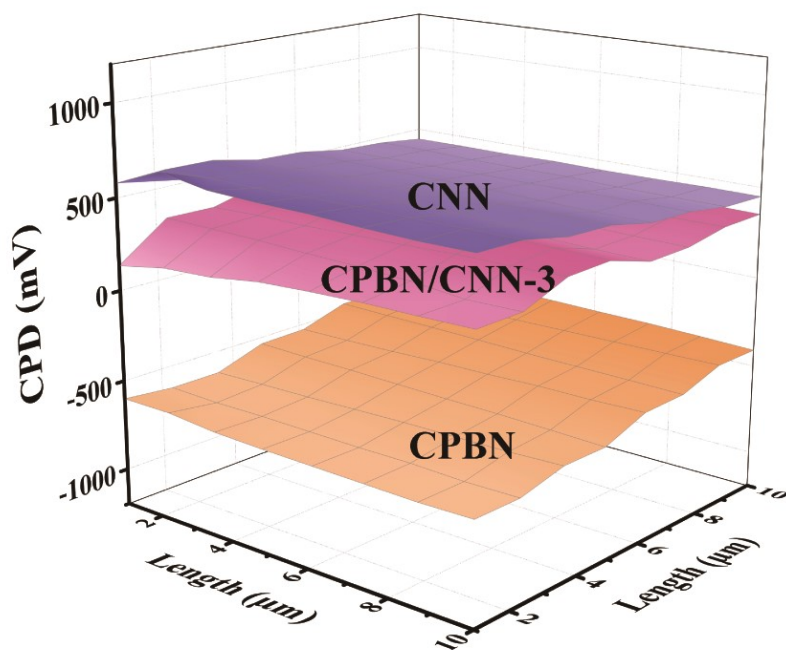

**Fig. S6** Relative WF maps of CNN, CPBN and CPBN/CNN-3.

To further investigate the electron transfer between CNN and CPBN, the work function (WF) was measured using a Kelvin probe (Fig. S7). The results show that when CNN and CPBN are in contact, electrons are transferred from CPBN to CNN through the contact interface.



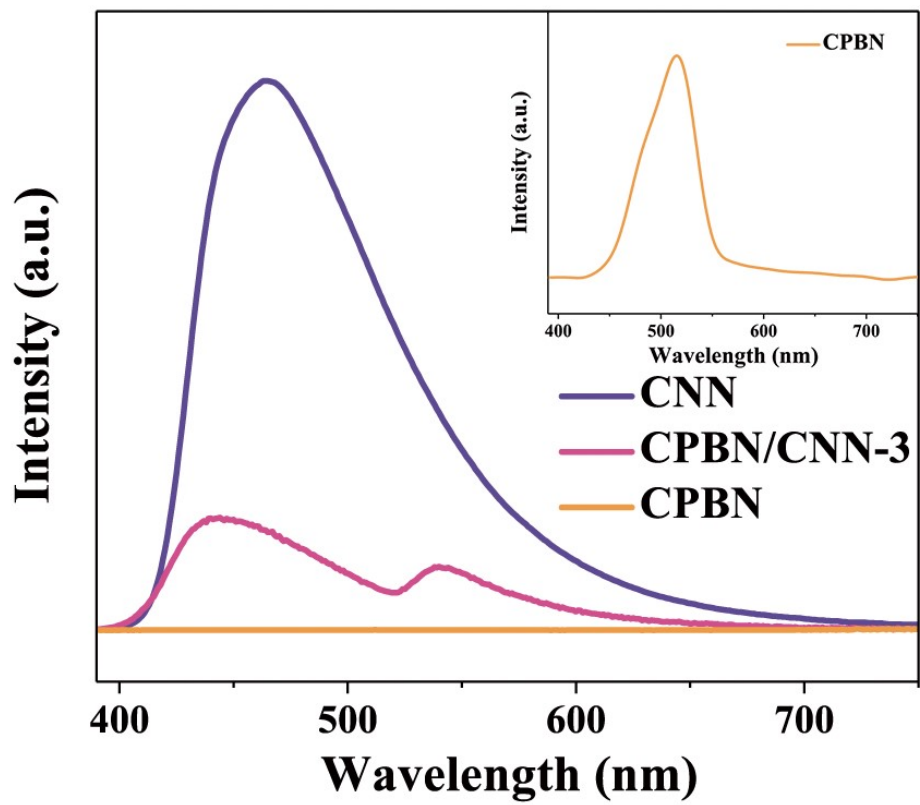

Fig. S7 Steady-state PL spectra of CNN, CPBN and CPBN/CNN-3.

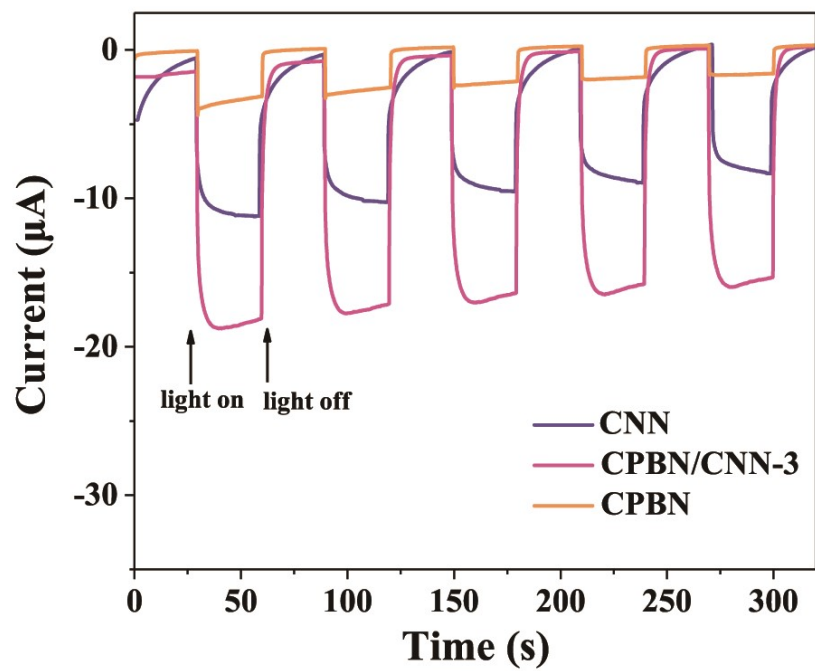

**Fig. S8** Photoelectrochemical amperometric I-t plots of CNN, CPBN and CPBN/CNN-3.

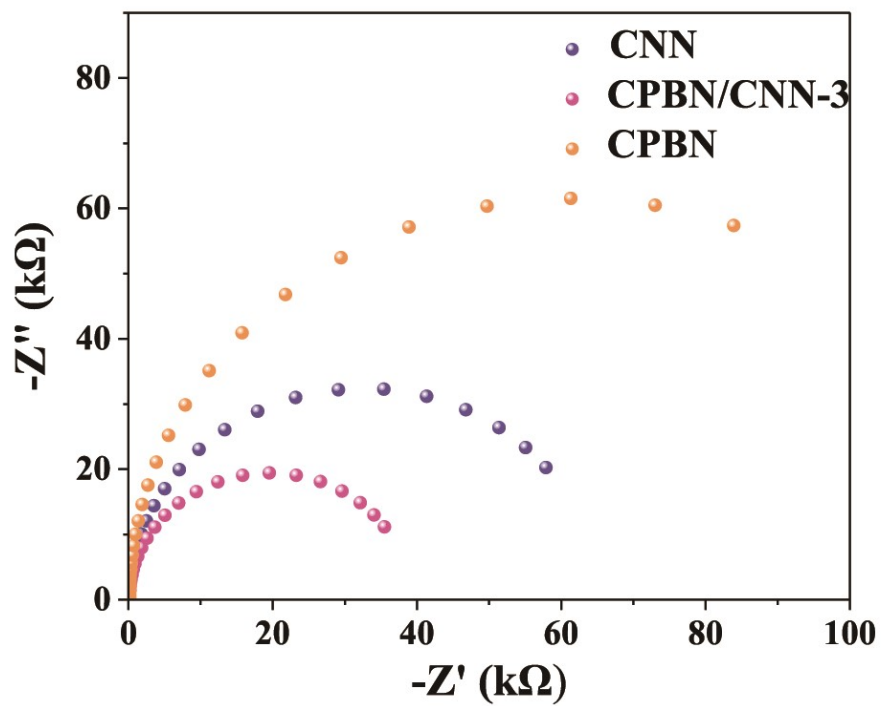

Fig. S9 EIS Nyquist plots of CNN, CPBN and CPBN/CNN-3.

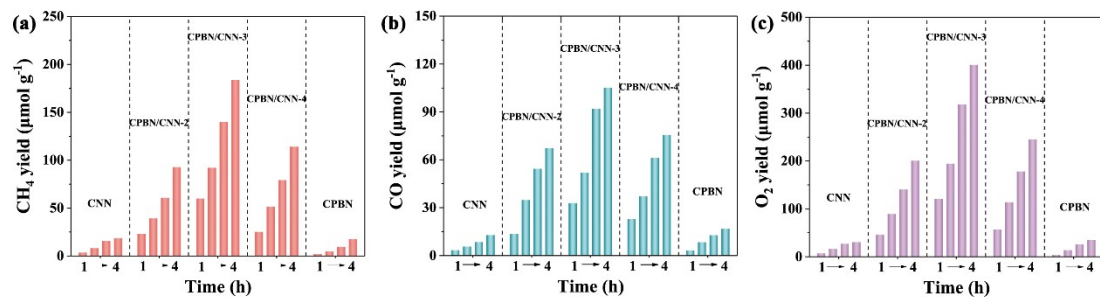

**Fig. S10** (a)  $\text{CH}_4$ , (b) CO and (c)  $\text{O}_2$  yield of CNN, CPBN and CPBN/CNN-X by recording every 1h upon illumination for 4 h.

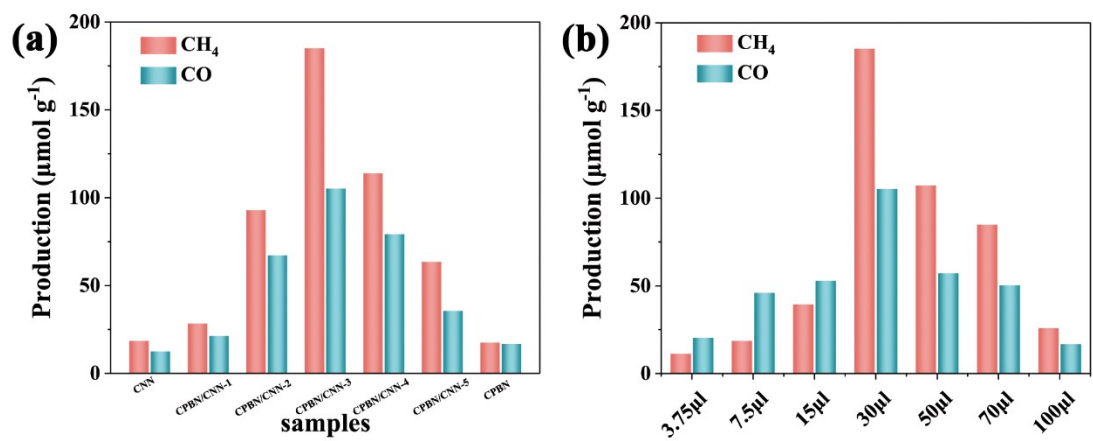

**Fig. S11** (a) Photocatalytic time courses of,  $\text{CO}$  and  $\text{CH}_4$  evolution of CNN, CPBN/CNN-X, CPBN, (b)  $\text{CH}_4$  and  $\text{CO}$  yield of as-synthesized photocatalysts, along with different amount water.

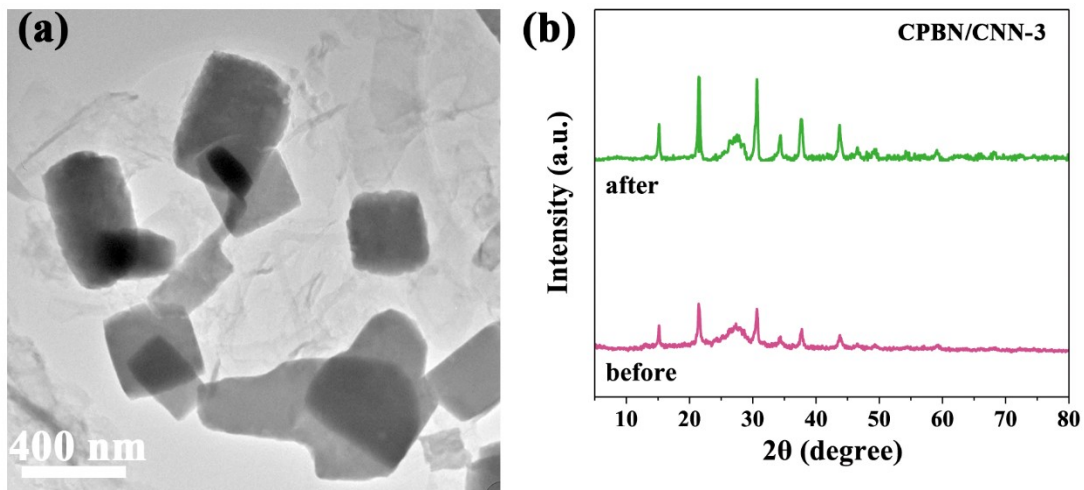

**Fig. S12** (a) TEM and (b) XRD patterns of CPBN/CNN-3 after photocatalytic reaction.

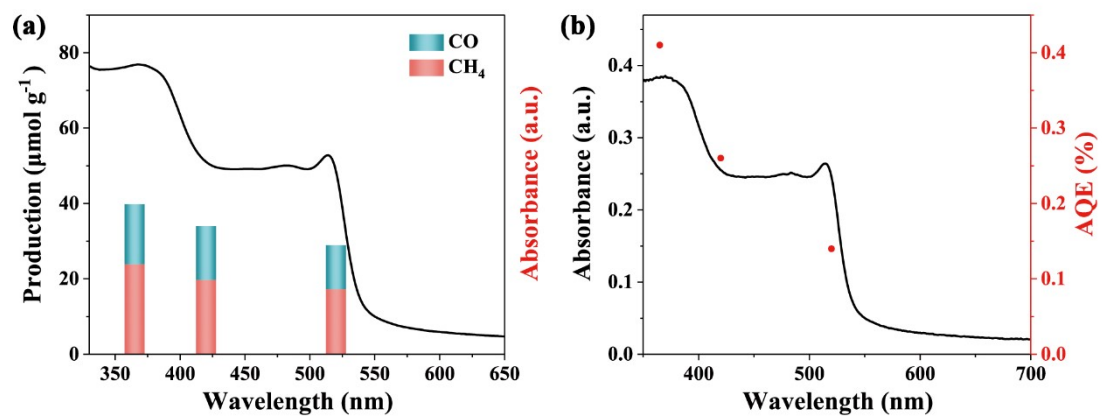

Fig. S13 The AQE of CPBN/CNN-3.

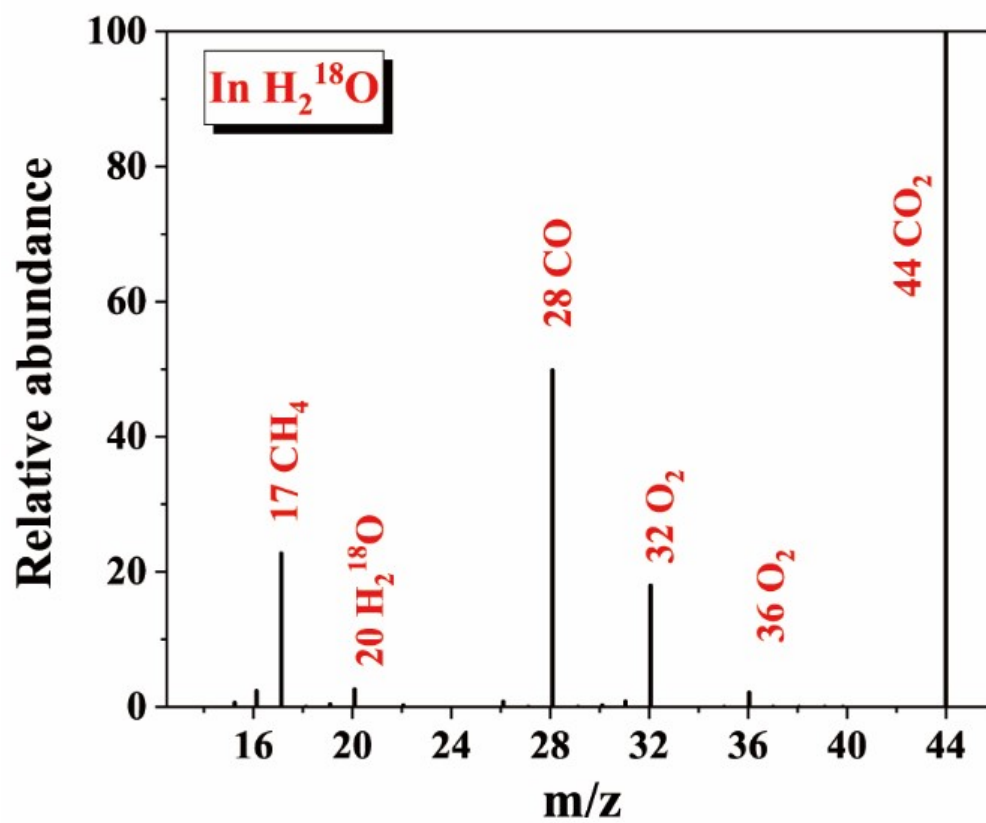

**Fig. S14** (a) GC-MS spectrum of the gas-phase products driven for CPBN/CNN-3 in the photocatalytic reduction of H<sub>2</sub><sup>18</sup>O.



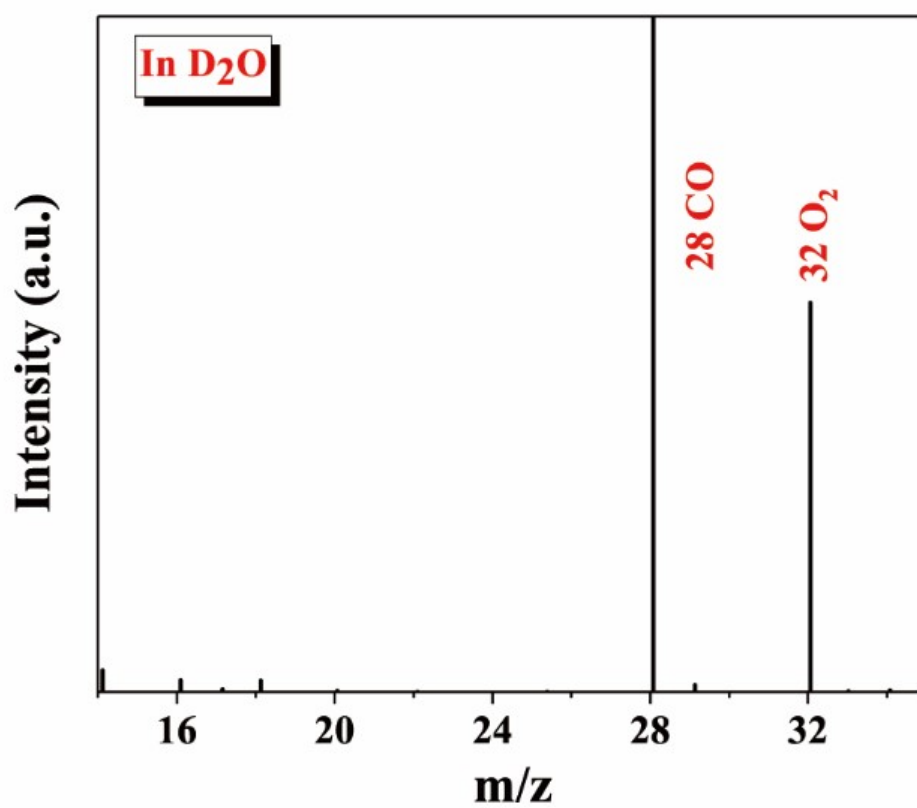

**Fig. S15** GC-MS spectrum of the gas-phase products driven for CPBN/CNN-3 in the photocatalytic reduction of D<sub>2</sub>O.

**Table S1.** Fitted PL decay parameters of CPBN, CNN and CPBN/CNN-3.

| Sample     | $\tau_1/\text{ns}$ | A1/%  | $\tau_2/\text{ns}$ | A2/%  | $\tau_3/\text{ns}$ | A3/%  | $\tau_{\text{average}}/\text{ns}$ |
|------------|--------------------|-------|--------------------|-------|--------------------|-------|-----------------------------------|
| CNN        | 3.13               | 37.58 | 12.58              | 42.92 | 67.52              | 19.51 | 14.63                             |
| CPBN       | 0.85               | 32.05 | 4.96               | 39.86 | 43.37              | 28.09 | 12.57                             |
| CPBN/CNN-3 | 3.28               | 34.22 | 13.69              | 41.49 | 93.64              | 24.29 | 23.73                             |

**Table S2.** Summary of photocatalytic CO<sub>2</sub> reduction performances of different catalysts after irradiation for 4 h

| Sample     | Yield <sub>CO</sub><br>/ $\mu\text{mol g}^{-1}$ | Yield <sub>CH<sub>4</sub></sub><br>/ $\mu\text{mol g}^{-1}$ | Yield <sub>O<sub>2</sub></sub><br>/ $\mu\text{mol g}^{-1}$ | Yield <sub>products</sub><br>/ $\mu\text{mol g}^{-1}$ | Yield <sub>electron</sub><br>/ $\mu\text{mol g}^{-1}$ <sup>a</sup> | R <sub>electron</sub><br>/ $\mu\text{mol g}^{-1} \text{h}^{-1}$ <sup>b</sup> |
|------------|-------------------------------------------------|-------------------------------------------------------------|------------------------------------------------------------|-------------------------------------------------------|--------------------------------------------------------------------|------------------------------------------------------------------------------|
| CNN        | 12.9                                            | 15.3                                                        | 30.6                                                       | 28.2                                                  | 148.2                                                              | 37.1                                                                         |
| CPBN/CNN-2 | 67.2                                            | 92.8                                                        | 200.6                                                      | 160.0                                                 | 876.8                                                              | 219.2                                                                        |
| CPBN/CNN-3 | 105.2                                           | 184.0                                                       | 398.3                                                      | 289.2                                                 | 1682.4                                                             | 420.6                                                                        |
| CPBN/CNN-4 | 79.2                                            | 114.0                                                       | 245.0                                                      | 193.2                                                 | 1070.2                                                             | 267.6                                                                        |
| CPBN       | 16.8                                            | 17.6                                                        | 35.4                                                       | 34.4                                                  | 174.4                                                              | 43.6                                                                         |

The catalytic performances of samples were calculated according to the total weight of hybrid materials.

<sup>a</sup> The electron consumption yield was calculated with the following equation:

$$\text{Yield}_{\text{electron}} = 2\text{Yield}_{\text{CO}} + 8\text{Yield}_{\text{CH}_4}$$

<sup>b</sup> The electron consumption rate was calculated with the following equation:

$$R_{\text{electron}} = \text{Yield}_{\text{electron}} / 4\text{h}$$

**Table S3.** Comparison of the measured evolution rates of O<sub>2</sub> with its theoretical ones in terms of the amount of photoreduction products.

|            | Photoreduction product rate<br>( $\mu\text{mol g}^{-1} \text{h}^{-1}$ ) |                              |
|------------|-------------------------------------------------------------------------|------------------------------|
|            | O <sub>2</sub><br>(theoretical)                                         | O <sub>2</sub><br>(measured) |
| CNN        | 30.6                                                                    | 37.6                         |
| CPBN/CNN-2 | 200.6                                                                   | 219.2                        |
| CPBN/CNN-3 | 398.3                                                                   | 420.6                        |
| CPBN/CNN-4 | 245.0                                                                   | 267.6                        |
| CPBN       | 35.4                                                                    | 43.6                         |

**Table S4.** Evolution of CO and CH<sub>4</sub> under different reaction conditions;

| Sample           | Condition           | Yield <sub>CO</sub><br>/μmol g <sup>-1</sup> | Yield <sub>CH<sub>4</sub></sub><br>/μmol g <sup>-1</sup> |
|------------------|---------------------|----------------------------------------------|----------------------------------------------------------|
| CPBN/CNN-3       | Ethyl acetate/water | 105.2                                        | 184.0                                                    |
| CPBN/CNN-3       | N <sub>2</sub>      | 3.6                                          | 5.9                                                      |
| CPBN/CNN-3       | Without light       | 0                                            | 0                                                        |
| CPBN/CNN-3       | Ethyl acetate       | 21.78                                        | 5.7                                                      |
| No photocatalyst | Ethyl acetate/water | 0                                            | 0                                                        |

**Table S5.** Summary of the photocatalytic CO<sub>2</sub> reduction performance of perovskite-based catalysts.

| Photocatalyst                                              | Condition                                  | Light source                                            | Products<br>/μmolg <sup>-1</sup> h <sup>-1</sup>        | R <sub>electron</sub> /<br>μmolg <sup>-1</sup> h <sup>-1</sup> | Ref | AQE                |
|------------------------------------------------------------|--------------------------------------------|---------------------------------------------------------|---------------------------------------------------------|----------------------------------------------------------------|-----|--------------------|
| CsPbBr <sub>3</sub> /GO                                    | ethyl acetate                              | 100W Xe Lamp<br>AM1.5G<br>150Mw/cm <sup>-2</sup>        | CO,4.9<br>CH <sub>4</sub> ,2.5<br>H <sub>2</sub> ,0.13  | 29.8                                                           | 1   | -                  |
| CsPbBr <sub>3</sub> -<br>Re(CO) <sub>3</sub> Br(dcbpy)     | Toluene<br>/isopropanol                    | 150W Xe Lamp<br>AM1.5G,>420nm<br>150Mw/cm <sup>-2</sup> | CO,34.8<br>CH <sub>4</sub> ,1.9                         | 73.4                                                           | 2   | -                  |
| MAPbI <sub>3</sub> @PCN-<br>221(Fe <sub>0.2</sub> )        | ethyl acetate<br>/water                    | 300W Xe Lamp<br>>400nm<br>100Mw/cm <sup>-2</sup>        | CO,4.2<br>CH <sub>4</sub> ,13                           | 112                                                            | 3   | -                  |
| CsPbBr <sub>3</sub> @ZIF-67                                | Gas<br>(CO <sub>2</sub> +H <sub>2</sub> O) | 100W Xe Lamp<br>AM1.5G<br>150Mw/cm <sup>-2</sup>        | CO,0.8<br>CH <sub>4</sub> ,3.8                          | 36.9                                                           | 4   | -                  |
| CsPbBr <sub>3</sub> @ZIF-8                                 | Gas<br>(CO <sub>2</sub> +H <sub>2</sub> O) | 100W Xe Lamp<br>AM1.5G<br>150Mw/cm <sup>-2</sup>        | CO,0.5<br>CH <sub>4</sub> ,1.8                          | 15.5                                                           | 4   | -                  |
| CsPbBr <sub>3</sub> NC<br>/UIO-66(NH <sub>2</sub> )        | ethyl acetate<br>/water                    | 300W Xe lamp<br>>420nm                                  | CO,8.2<br>CH <sub>4</sub> ,0.3                          | 18.5                                                           | 5   | -                  |
| CsPbBr <sub>3</sub> QD <sub>s</sub><br>/PCN                | acetonitrile/<br>water                     | 300W Xe lamp<br>>420nm                                  | CO,148.9                                                | 297.8                                                          | 6   | -                  |
| CsPbBr <sub>3</sub> NC<br>/α-TiO <sub>2</sub>              | ethyl acetate<br>/isopropanol              | 150W Xe Lamp<br>AM1.5G<br>150Mw/cm <sup>-2</sup>        | CO,3.9<br>CH <sub>4</sub> ,6.7<br>H <sub>2</sub> ,1.5   | 64.5                                                           | 7   | -                  |
| CsPbBr <sub>3</sub> NC<br>/Pd NC                           | Gas<br>(CO <sub>2</sub> +H <sub>2</sub> O) | 150W Xe Lamp<br>AM1.5G<br>150Mw/cm <sup>-2</sup>        | CO,1.9<br>CH <sub>4</sub> ,3.6<br>H <sub>2</sub> ,1.1   | 33.8                                                           | 8   | 0.017%<br>(420 nm) |
| CsPbBr <sub>3</sub> @CN                                    | ethyl acetate                              | 450W Xe Lamp<br>AM1.5G                                  | CO,3.1<br>CH <sub>4</sub> ,22.9                         | 189.4                                                          | 9   | -                  |
| PtCsPbBr <sub>3</sub> /<br>Bi <sub>2</sub> WO <sub>6</sub> | ethyl acetate/<br>isopropanol              | 150W Xe Lamp<br>AM1.5G<br>100Mw/cm <sup>-2</sup>        | CO,17.2<br>CH <sub>4</sub> ,34.4<br>H <sub>2</sub> ,7.4 | 324.0                                                          | 10  | -                  |

|                                                                      |                                         |                                                         |                                                       |       |           |                   |
|----------------------------------------------------------------------|-----------------------------------------|---------------------------------------------------------|-------------------------------------------------------|-------|-----------|-------------------|
| CsPbBr <sub>3</sub> @TiO-CN                                          | ethyl acetate /water                    | 300W Xe lamp<br>100Mw/cm <sup>-2</sup>                  | CO,12.9                                               | 25.8  | 11        | -                 |
| CsPbBr <sub>3</sub> NCs /MXene-20                                    | ethyl acetate                           | 300W Xe Lamp<br>>420nm                                  | CO,26.6<br>CH <sub>4</sub> ,6.8                       | 107.6 | 12        | -                 |
| α-Fe <sub>2</sub> O <sub>3</sub> /Amine-RGO/CsPbBr <sub>3</sub>      | Gas (CO <sub>2</sub> +H <sub>2</sub> O) | 150W Xe Lamp<br>AM1.5G,>420nm<br>150Mw/cm <sup>-2</sup> | CO,2.3<br>CH <sub>4</sub> ,9.4<br>H <sub>2</sub> ,0.3 | 80.7  | 13        | -                 |
| CsPbBr <sub>3</sub> /USGO/α-Fe <sub>2</sub> O <sub>3</sub>           | acetonitrile/water                      | 300W Xe Lamp<br>>400nm<br>100Mw/cm <sup>-2</sup>        | CO,73.8                                               | 147.6 | 14        | -                 |
| CsPbBr <sub>3</sub> /BP                                              | ethyl acetate /water                    | 300W Xe Lamp<br>200Mw/cm <sup>-2</sup>                  | CO,44.7<br>CH <sub>4</sub> ,10.7                      | 175.0 | 15        | -                 |
| CsPbBr <sub>3</sub> QD <sub>5</sub> /Bi <sub>2</sub> WO <sub>6</sub> | ethyl acetate /water                    | >400nm<br>100Mw/cm <sup>-2</sup>                        | CO+CH <sub>4</sub> ,<br>50.3                          | 144.4 | 16        | -                 |
| FAPbBr <sub>3</sub> /Bi <sub>2</sub> WO <sub>6</sub>                 | benzyl alcohol                          | 150W Xe Lamp<br>AM1.5G<br>100Mw/cm <sup>-2</sup>        | CO,170                                                | 340.0 | 17        | 1.2%<br>(400 nm)  |
| CsPbBr <sub>3</sub> /C <sub>3</sub> N <sub>4</sub>                   | ethyl acetate /water                    | 150W Xe Lamp<br>AM1.5G<br>150Mw/cm <sup>-2</sup>        | CO,26.3<br>CH <sub>4</sub> ,46.0                      | 420.6 | This work | 0.24%<br>(420 nm) |

## References:

1. Y. F. Xu, M. Z. Yang, B. X. Chen, X. D. Wang, H. Y. Chen, D. B. Kuang and C. Y. Su, *J. Am. Chem. Soc.*, 2017, **139**, 5660 —5663.
2. Z.C. Kong, H.H. Zhang, J.F. Liao, Y.-J. Dong, Y. Jiang, H.Y. Chen and D.B. Kuang, *Solar RRL*, 2019, **4**, 1900365.
3. L.-Y. Wu, Y.-F. Mu, X.-X. Guo, W. Zhang, Z.-M. Zhang, M. Zhang and T.-B. Lu, *Angew. Chem., Int. Ed.*, 2019, **58**, 9491 —9495.
4. Z.-C. Kong, J.-F. Liao, Y.-J. Dong, Y.-F. Xu, H.-Y. Chen, D.-B. Kuang and C.-Y. Su, *ACS Energy Lett.*, 2018, **3**, 2656 —2662.
5. S. Wan, M. Ou, Q. Zhong and X. Wang, *Chem. Eng. J.*, 2019, **358**, 1287 —1295.
6. M. Ou, W. Tu and S. Yin, et al., *Angew. Chem.*, 2018, **130**, 13758 —13762.
7. Y. F. Xu, X. D. Wang, J. F. Liao, B. X. Chen, H. Y. Chen and D. B. Kuang, *Adv. Mater. Interfaces*, 2018, **5**, 1801015.
8. Y.-F. Xu, M.-Z. Yang, H.-Y. Chen, J.-F. Liao, X.-D. Wang and D.-B. Kuang, *ACS Appl. Energy Mater.*, 2018, **1**, 5083 —5089.
9. S.-Q. You, S.-H. Guo, X. Zhao, M. Sun, C.-Y. Sun, Z.-M. Su and X.-L. Wang, *Dalton Trans.*, 2019, **48**, 14115 —14121.
10. Y. Jiang, H. Chen, J. Li, J. Liao, H. Zhang, X. Wang and D. Kuang, *Adv. Funct. Mater.*, 2020, **30**, 2004293.
11. X.-X. Guo, S.-F. Tang, Y.-F. Mu, L.-Y. Wu, G.-X. Dong and M. Zhang, *RSC Adv.*, 2019, **9**, 34342 —34348.
12. A. Pan, X. Ma, S. Huang, Y. Wu, M. Jia, Y. Shi, Y. Liu, P. Wangyang, L. He and Y. Liu, *J. Phys. Chem. Lett.*, 2019, **10**, 6590 —6597.
13. Y. Jiang, J. Liao, H. Chen, H. Zhang, J. Li, X. Wang and D. Kuang, *Chem*, 2020, **6**, 766 —780.
14. Y. F. Mu, W. Zhang, G. X. Dong, K. Su, M. Zhang and T. B. Lu, *Small*, 2020, **16**, e2002140.
15. X. D. Wang, J. He, J. Y. Li, G. Lu, F. Dong, T. Majima and M. S. Zhu, *Appl. Catal., B*, 2020, **277**, 119230.
16. J. Wang, J. Wang, N. Li, X. Du, J. Ma, C. He and Z. Li, *ACS Appl. Mater. Interfaces*, 2020, **12**, 31477 —31485.
17. H. Huang, J. Zhao, Y. Du, C. Zhou, M. Zhang, Z. Wang, Y. Weng, J. Long, J. Hofkens, J. A. Steele and M. B. J. Roeloffs, *ACS Nano*, 2020, **14**, 16689 —16697.
